# Supplementary material for: Preparation and practical applications of a phosphate capture material with FeO(OH)-loaded polyurethane
Source: Royal Society of Chemistry journal article supplement (doi:10.1039/d4ew00696h), 2024-11-11
Supplement: d4ew00696h1.pdf [file d4ew00696h1.pdf]

## Electronic supplementary information

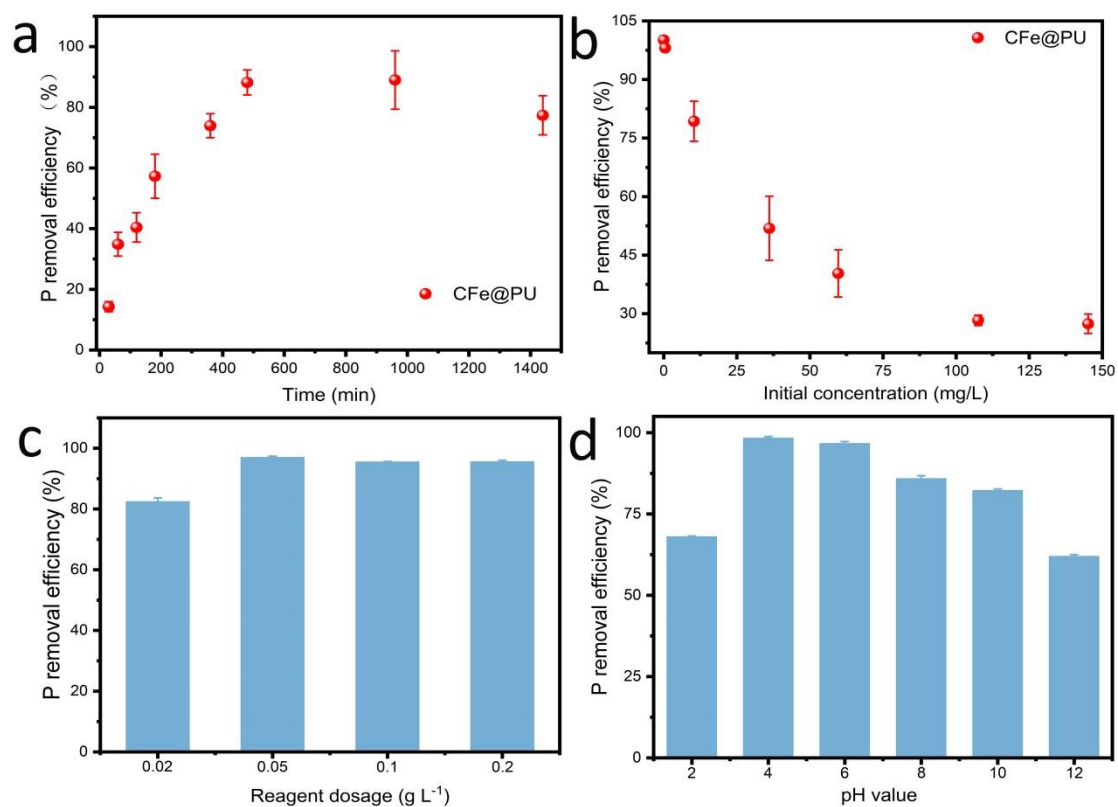

Fig. S1 (a) phosphate removal curve by CFe@PU with time; (b) phosphate removal curve by CFe@PU at different concentrations; (c) effect of CFe@PU addition amount on phosphate removal efficiency; (d) pH change after adsorption on phosphate with CFe@PU.
